# Supplementary material for: Self-emitting blue and red EuOX (X = F, Cl, Br, I) materials: band structure, charge transfer energy, and emission energy
Source: Royal Society of Chemistry journal article supplement (doi:10.1039/c8cp06470a), 2018-12-27
Supplement: c8cp06470a1.pdf [file c8cp06470a1.pdf]

## Supporting information

### Physical Chemistry Chemical Physics

#### Self-Emitting Blue and Red EuOX (X = F, Cl, Br, I) Materials: Band Structure, Charge Transfer Energy, and Emission Energy

Donghyeon Kim,<sup>a</sup> Jae Ryeol Jeong,<sup>b</sup> Yujin Jang,<sup>c</sup> Jong-Seong Bae,<sup>c</sup> In Chung,<sup>d</sup> Runli Liang,<sup>e</sup>

Dong-Kyun Seo,<sup>\*e</sup> Seung-Joo Kim,<sup>a</sup> Jung-Chul Park<sup>\*b</sup>

<sup>a</sup> Department of Energy Systems Research and Department of Chemistry, Ajou University,  
Suwon 16499, Republic of Korea

<sup>b</sup> Center for Green Fusion Technology and Department of Engineering in Energy & Applied  
Chemistry, Silla University, Busan 46958, Republic of Korea

<sup>c</sup> Busan Center, Korea Basic Science Institute, Busan 46742, Republic of Korea

<sup>d</sup> School of Chemical and Biological Engineering, Seoul National University, Seoul 08826,  
Korea

<sup>e</sup> Department of Chemistry and Biochemistry, Arizona State University, Tempe, AZ 85287-  
1604, USA

Corresponding: Jung-Chul Park

Center for Green Fusion Technology and Department of Engineering in Energy & Applied  
Chemistry, Silla University, Busan 617-736, Republic of Korea

Telephone: +82-51-999-5469

Fax number: +82-51-999-5652

E-mail: [parkjc@silla.ac.kr](mailto:parkjc@silla.ac.kr)

**Table S1.** Refinement Atomic Position for EuOX (X = F, Cl, Br, I) materials

| EuOF  |            |          |          |           |                         |
|-------|------------|----------|----------|-----------|-------------------------|
| Atom  | Site       | <i>x</i> | <i>y</i> | <i>z</i>  | <i>B</i> <sub>iso</sub> |
| Eu    | 6 <i>c</i> | 0        | 0        | 0.2418(1) | 0.22(3)                 |
| O     | 6 <i>c</i> | 0        | 0        | 0.1219(5) | 0.5(3)                  |
| F     | 6 <i>c</i> | 0        | 0        | 0.3702(4) | 0.5(2)                  |
| EuOCl |            |          |          |           |                         |
| Atom  | Site       | <i>x</i> | <i>y</i> | <i>z</i>  | <i>B</i> <sub>iso</sub> |
| Eu    | 2 <i>c</i> | 0.25     | 0.25     | 0.1724(1) | 0.09(4)                 |
| O     | 2 <i>a</i> | 0.75     | 0.25     | 0         | 0.5(3)                  |
| Cl    | 2 <i>c</i> | 0.25     | 0.25     | 0.6263(5) | 0.4(1)                  |
| EuOBr |            |          |          |           |                         |
| Atom  | Site       | <i>x</i> | <i>y</i> | <i>z</i>  | <i>B</i> <sub>iso</sub> |
| Eu    | 2 <i>c</i> | 0.25     | 0.25     | 0.1447(1) | 0.45(3)                 |
| O     | 2 <i>a</i> | 0.75     | 0.25     | 0         | 1.9(4)                  |
| Br    | 2 <i>c</i> | 0.25     | 0.25     | 0.6575(2) | 0.77(5)                 |
| EuOI  |            |          |          |           |                         |
| Atom  | Site       | <i>x</i> | <i>y</i> | <i>z</i>  | <i>B</i> <sub>iso</sub> |
| Eu    | 2 <i>c</i> | 0.25     | 0.25     | 0.1229(1) | 0.53(4)                 |
| O     | 2 <i>a</i> | 0.75     | 0.25     | 0         | 0.4(3)                  |
| I     | 2 <i>c</i> | 0.25     | 0.25     | 0.6736(1) | 0.546(2)                |

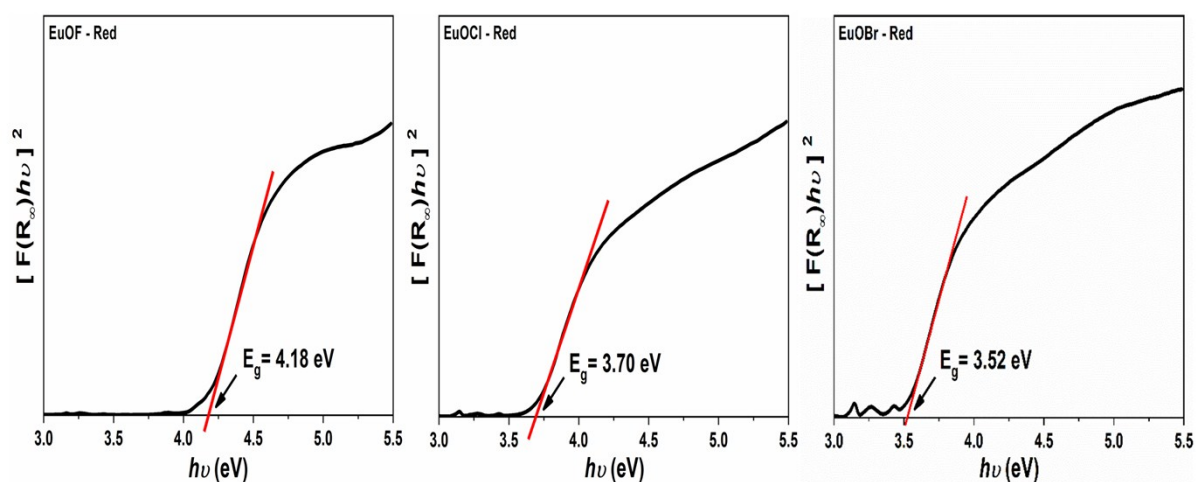**Figure S1.** Band-gap energy ( $E_g$ ) of EuOX (X = F, Cl, Br) materials using the Kubelka-Munk function.
